# Supplementary material for: Cytokine Deficiencies in Patients with Long-COVID
Source: PubMed Central journal article supplement (PMC9894377), 2022-11-18
Supplement: NIHMS1854241-supplement-Suppl__Table_1.pdf [file NIHMS1854241-supplement-Suppl__Table_1.pdf]

**Supplemental Table 1.** Comparison of publications depicting cytokine fluctuation in ME/CFS and our long-COVID cytokine results.

| Cytokine                  | Higher in ME/CFS                    | Lower in ME/CFS       | No Change                                              | Total Studies | Long-COVID       |
|---------------------------|-------------------------------------|-----------------------|--------------------------------------------------------|---------------|------------------|
| <b>Pro-inflammatory</b>   |                                     |                       |                                                        |               |                  |
| IL-1b                     | <b>7 (28%)</b> [1-7]                | 0                     | 18 (72%) [8-25]                                        | 25            | <b>NC</b>        |
| TNFa                      | <b>4 (15%)</b> [1, 2, 5, 21]        | 0                     | 22 (85%) [4, 6-20, 22, 24-28]                          | 26            | <b>NC</b>        |
| IL-6                      | <b>6 (24%)</b> [1, 4, 6, 7, 11, 29] | 2 (8%) [2, 9]         | 17 (68%) [8, 10, 12-16, 18, 19, 21, 23, 24, 26, 30-33] | 25            | <b>Down</b>      |
| <b>Anti-inflammatory</b>  |                                     |                       |                                                        |               |                  |
| IL-10                     | <b>2 (13%)</b> [1, 2]               | 1 (6%) [9]            | 12 (81%) [4, 6-8, 11-16, 18, 28]                       | 15            | <b>NC</b>        |
| IL-13                     | <b>1 (16%)</b> [1]                  | 0                     | 5 (84%) [6-9, 13-15]                                   | 6             | <b>Down</b>      |
| <b>Th1</b>                |                                     |                       |                                                        |               |                  |
| IL-2                      | <b>2 (14%)</b> [11, 13]             | 0                     | 12 (86%) [1, 4, 7-9, 13-15, 18, 21, 25, 34]            | 14            | <b>Down</b>      |
| IL-12                     | <b>3 (30%)</b> [1, 7, 11]           | 0                     | 7 (70%) [6, 8, 9, 13-15, 18]                           | 10            | <b>NC</b>        |
| IFN $\gamma$              | <b>2 (13%)</b> [1, 11]              | 1 (6%) [2]            | 12 (81%) [6-10, 13-15, 22, 23, 25, 28]                 | 15            | <b>Down to 0</b> |
| <b>Th2</b>                |                                     |                       |                                                        |               |                  |
| IL-5                      | 1 (14%) [7]                         | 1 (14%) [1]           | 5 (72%) [8, 9, 11, 13, 14]                             | 7             | <b>NC</b>        |
| IL-4                      | <b>2 (18%)</b> [1, 7]               | 0                     | 9 (82%) [8, 9, 11-16, 21]                              | 11            | <b>Down</b>      |
| <b>Th17</b>               |                                     |                       |                                                        |               |                  |
| IL-17                     | 0                                   | <b>2 (33%)</b> [1, 9] | 4 (66%) [7, 8, 13, 14]                                 | 6             | <b>Down</b>      |
| <b>NK-cell attractant</b> |                                     |                       |                                                        |               |                  |
| IL-8                      | 3 (23%) [2, 6, 14]                  | 3 (23%) [1, 7, 9]     | 7 (54%) [8, 11-13, 15, 16, 29]                         | 13            | <b>Down to 0</b> |

1 Adapted from Blundell *et al.* 2015[35]. There is no agreement regarding changes in cytokine  
2 levels associated with ME/CFS. Although studies that do report changes tend to report  
3 cytokines as being upregulated in ME/CFS as compared to our long-COVID cytokine data  
4 showing significant decreases in cytokine levels.

5

6 Supplemental References:

7

- 8 [1] S.F. Khaiboullina, K.L. DeMeirleir, S. Rawat, G.S. Berk, R.S. Gaynor-Berk, T. Mijatovic, N. Blatt,  
9 A.A. Rizvanov, S.G. Young, V.C. Lombardi, Cytokine expression provides clues to the  
10 pathophysiology of Gulf War illness and myalgic encephalomyelitis, *Cytokine* 72(1) (2015) 1-8.
- 11 [2] D. Neu, O. Mairesse, X. Montana, M. Gilson, F. Corazza, N. Lefevre, P. Linkowski, O. Le Bon,  
12 P. Verbanck, Dimensions of pure chronic fatigue: psychophysical, cognitive and biological  
13 correlates in the chronic fatigue syndrome, *Eur J Appl Physiol* 114(9) (2014) 1841-51.
- 14 [3] M. Maes, K. Ringel, M. Kubera, G. Anderson, G. Morris, P. Galecki, M. Geffard, In myalgic  
15 encephalomyelitis/chronic fatigue syndrome, increased autoimmune activity against 5-HT is  
16 associated with immuno-inflammatory pathways and bacterial translocation, *J Affect Disord*  
17 150(2) (2013) 223-30.
- 18 [4] E.G. Lattie, M.H. Antoni, M.A. Fletcher, F. Penedo, S. Czaja, C. Lopez, D. Perdomo, A. Sala, S.  
19 Nair, S.H. Fu, N. Klimas, Stress management skills, neuroimmune processes and fatigue levels in  
20 persons with chronic fatigue syndrome, *Brain Behav Immun* 26(6) (2012) 849-58.
- 21 [5] M. Maes, F.N. Twisk, M. Kubera, K. Ringel, Evidence for inflammation and activation of cell-  
22 mediated immunity in Myalgic Encephalomyelitis/Chronic Fatigue Syndrome (ME/CFS):  
23 increased interleukin-1, tumor necrosis factor-alpha, PMN-elastase, lysozyme and neopterin, *J*  
24 *Affect Disord* 136(3) (2012) 933-9.
- 25 [6] P. Scully, D.P. McKernan, J. Keohane, D. Groeger, F. Shanahan, T.G. Dinan, E.M. Quigley,  
26 Plasma Cytokine Profiles in Females With Irritable Bowel Syndrome and Extra-Intestinal Co-  
27 Morbidity, *Official journal of the American College of Gastroenterology | ACG* 105(10) (2010)  
28 2235-2243.
- 29 [7] M.A. Fletcher, X.R. Zeng, Z. Barnes, S. Levis, N.G. Klimas, Plasma cytokines in women with  
30 chronic fatigue syndrome, *J Transl Med* 7 (2009) 96.
- 31 [8] V.B. Wyller, O. Sorensen, D. Sulheim, E. Fagermoen, T. Ueland, T.E. Mollnes, Plasma cytokine  
32 expression in adolescent chronic fatigue syndrome, *Brain Behav Immun* 46 (2015) 80-6.
- 33 [9] J.G.M. Mady Hornig, Nancy G. Klimas, Susan Levine, Donna Felsenstein, Lucinda Bateman,  
34 Daniel L. Peterson, C. Gunnar Gottschalk, Andrew F. Schultz, Xiaoyu Che, Meredith L. Eddy,  
35 Anthony L. Komaroff, W. Ian Lipkin, Distinct plasma immune signatures in ME/CFS are present  
36 early in the course of illness, *Sci Adv* (2015).
- 37 [10] Y. Nakatomi, K. Mizuno, A. Ishii, Y. Wada, M. Tanaka, S. Tazawa, K. Onoe, S. Fukuda, J.  
38 Kawabe, K. Takahashi, Y. Kataoka, S. Shiomi, K. Yamaguti, M. Inaba, H. Kuratsune, Y. Watanabe,  
39 Neuroinflammation in Patients with Chronic Fatigue Syndrome/Myalgic Encephalomyelitis: An  
40 (1)(1)C-(R)-PK11195 PET Study, *J Nucl Med* 55(6) (2014) 945-50.
- 41 [11] M.N. Garcia, A.M. Hause, C.M. Walker, J.S. Orange, R. Hasbun, K.O. Murray, Evaluation of  
42 prolonged fatigue post-West Nile virus infection and association of fatigue with elevated  
43 antiviral and proinflammatory cytokines, *Viral immunology* 27(7) (2014) 327-33.

- 1 [12] T. Nakamura, S. Schwander, R. Donnelly, D.B. Cook, F. Ortega, F. Togo, Y. Yamamoto, N.S.  
2 Cherniack, M. Klapholz, D. Rapoport, B.H. Natelson, Exercise and sleep deprivation do not  
3 change cytokine expression levels in patients with chronic fatigue syndrome, *Clinical and*  
4 *vaccine immunology : CVI* 20(11) (2013) 1736-42.
- 5 [13] G.B. Anne Liese Smylie , Henrique Fernandes , Shirin Razdan , Zachary Barnes , Fanny  
6 Collado , Connie Sol , Mary Ann Fletcher and Nancy Klimas, A comparison of sex-specific  
7 immune signatures in Gulf War illness and chronic fatigue syndrome, *BMC Immunology* 14  
8 (2013).
- 9 [14] G.K. Broderick, Ben Z; Fernandes, Henrique; Fletcher, Mary Ann; Klimas, Nancy; Smith,  
10 Frederick A; O’Gorman, Maurice RG; Vernon, Suzanne D; Taylor, Renee, cytokine expression  
11 profiles of immune imbalance in post-mononucleosis chronic fatigue, *Journal of Translational*  
12 *Medicine* 10 (2012).
- 13 [15] A.T. White, A.R. Light, R.W. Hughen, L. Bateman, T.B. Martins, H.R. Hill, K.C. Light, Severity  
14 of symptom flare after moderate exercise is linked to cytokine activity in chronic fatigue  
15 syndrome, *Psychophysiology* 47(4) (2010) 615-24.
- 16 [16] T. Nakamura, S.K. Schwander, R. Donnelly, F. Ortega, F. Togo, G. Broderick, Y. Yamamoto,  
17 N.S. Cherniack, D. Rapoport, B.H. Natelson, Cytokines across the night in chronic fatigue  
18 syndrome with and without fibromyalgia, *Clinical and vaccine immunology : CVI* 17(4) (2010)  
19 582-7.
- 20 [17] V.A. Spence, G. Kennedy, J.J. Belch, A. Hill, F. Khan, Low-grade inflammation and arterial  
21 wave reflection in patients with chronic fatigue syndrome, *Clin Sci (Lond)* 114(8) (2008) 561-6.
- 22 [18] U. Vollmer-Conna, B. Cameron, D. Hadzi-Pavlovic, K. Singletary, T. Davenport, S. Vernon,  
23 W.C. Reeves, I. Hickie, D. Wakefield, A.R. Lloyd, G. Dubbo Infective Outcomes Study,  
24 Postinfective fatigue syndrome is not associated with altered cytokine production, *Clin Infect*  
25 *Dis* 45(6) (2007) 732-5.
- 26 [19] K.L. MacDonald, T.O. Michael, K.H. LeDell, K.E. White, C.H. Schenck, C.C. Chao, D.H. Persing,  
27 R.C. Johnson, J.M. Barker, P.K. Peterson, A case-Control Study to Assess Possible Triggers and  
28 Cofactors in Chronic Fatigue Syndrome, *The American Journal of Medicine* 100 (1996).
- 29 [20] C.M.A. Swanink, J.H.M.M. Vercoulen, J.M.D. Galama, M.T.L. Roos, L. Meyaard, J.v.d. Ven-  
30 Jongekrijg, R.d. Nijs, G. Bleijenberg, J.F.M. Fennis, F. Miedema, Lymphocyte subsets, apoptosis,  
31 and cytokines in patients with chronic fatigue syndrome, *Journal of Infectious Diseases* 173(2)  
32 (1996).
- 33 [21] R. Patarca, N.G. Klimas, S. Lugtendorf, M. Antoni, M.A. Fletcher, Dysregulated Expression of  
34 Tumor Necrosis Factor in Chronic Fatigue Syndrome: Interrelations with Cellular Sources and  
35 Patterns of Soluble Immune Mediator Expression, *Clinical Infectious Diseases*  
36 18(Supplement\_1) (1994) S147-S153.
- 37 [22] A. Lloyd, S. Gandevia, A. Brockman, J. Hales, D. Wakefield, Cytokine Production and Fatigue  
38 in Patients with Chronic Fatigue Syndrome and Healthy Control Subjects in Response to  
39 Exercise, *Clinical Infectious Diseases* 18(Supplement\_1) (1994) S142-S146.
- 40 [23] A. Linde, B. Andersson, S.B. Svenson, H. Ahrne, M. Carlsson, P. Forsberg, H. Hugo, A.  
41 Karstorp, R. Lenkei, A. Lindwall, A. Loftenius, C. Säil, J. Andersson, Serum Levels of Lymphokines  
42 and Soluble Cellular Receptors in Primary Epstein-Barr Virus Infection and in Patients with  
43 Chronic Fatigue Syndrome, *The Journal of Infectious Diseases* 165(6) (1992) 994-1000.

- 1 [24] C.C. Chao, E.N. Janoff, S.X. Hu, K. Thomas, M. Gallagher, M. Tsang, P.K. Peterson, Altered  
2 cytokine release in peripheral blood mononuclear cell cultures from patients with the chronic  
3 fatigue syndrome, *Cytokine* 3(4) (1991) 292-8.
- 4 [25] S.E. Straus, J.K. Dale, J.B. Peter, C.A. Dinarello, Circulating Lymphokine Levels in the Chronic  
5 Fatigue Syndrome, *The Journal of Infectious Diseases* 160(6) (1989) 1085-1086.
- 6 [26] Y. Jammes, J.G. Steinberg, S. Delliaux, F. Bregeon, Chronic fatigue syndrome combines  
7 increased exercise-induced oxidative stress and reduced cytokine and Hsp responses, *J Intern  
8 Med* 266(2) (2009) 196-206.
- 9 [27] P.D. White, K.E. Nye, A.J. Pinching, T.M. Yap, N. Power, V. Vleck, D.J. Bentley, J.M. Thomas,  
10 M. Buckland, J.M. Parkin, Immunological Changes After Both Exercise and Activity in Chronic  
11 Fatigue Syndrome, *Journal of Chronic Fatigue Syndrome* 12(2) (2004) 51-66.
- 12 [28] J. Visser, W. Graffelman, B. Blauw, I. Haspels, E. Lentijes, E.R.d. Kloet, L. Nagelkerken, LPS-  
13 induced IL-10 production in whole blood cultures from chronic fatigue syndrome patients is  
14 increased but supersensitive to inhibition by dexamethasone, *Journal of Neuroimmunology* 119  
15 (2001).
- 16 [29] K. Nas, R. Cevik, S. Batum, A.J. Sarac, S. Acar, S. Kalkanli, Immunologic and psychosocial  
17 status in chronic fatigue syndrome, *Bratisl Lek Listy* 112(4) (2011) 208-12.
- 18 [30] M. Robinson, S.R. Gray, M.S. Watson, G. Kennedy, A. Hill, J.J. Belch, M.A. Nimmo, Plasma  
19 IL-6, its soluble receptors and F2-isoprostanes at rest and during exercise in chronic fatigue  
20 syndrome, *Scand J Med Sci Sports* 20(2) (2010) 282-90.
- 21 [31] U.M. Nater, L.S. Youngblood, J.F. Jones, E.R. Unger, A.H. Miller, W.C. Reeves, C. Heim,  
22 Alterations in diurnal salivary cortisol rhythm in a population-based sample of cases with  
23 chronic fatigue syndrome, *Psychosom Med* 70(3) (2008) 298-305.
- 24 [32] J.G. Cannon, J.B. Angel, R.W. Ball, L.W. ABAD, L.R. Fagioli, A.L. Kamaroff, Acute Phase  
25 Responses and Cytokine Secretion in Chronic Fatigue Syndrome, *Journal of Clinical Immunology*  
26 19 (1999).
- 27 [33] D. Buchwald, M.H. Wener, T. Pearlman, P. Kith, Markers of inflammation and immune  
28 activation in chronic fatigue and chronic fatigue syndrome, *J Rheumatol* 24(2) (1997) 372-6.
- 29 [34] P.R. Cheney, S.E. Dorman, D.s. Bell, Interleukin-2 and the Chronic Fatigue Syndrome,  
30 *Annals of Internal Medicine* 110 (1989).
- 31 [35] S. Blundell, K.K. Ray, M. Buckland, P.D. White, Chronic fatigue syndrome and circulating  
32 cytokines: A systematic review, *Brain Behav Immun* 50 (2015) 186-195.
- 33
